# Supplementary material
Source: HighWire-hosted journal article supplement (https://erj.ersjournals.com/content/58/1/2003387)
Supplement: inline-supplementary-material-1 [file inline-supplementary-material-1.pdf]

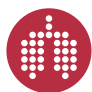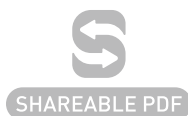

# The accuracy of forced vital capacity for diagnosing restrictive allograft syndrome and mixed phenotype of chronic lung allograft dysfunction

Liran Levy <sup>1,2</sup>, Ella Huszti<sup>3</sup>, Gregory Berra<sup>1</sup>, Benjamin Renaud-Picard <sup>1</sup>, Mitsuaki Kawashima<sup>1</sup>, Akihiro Takahagi<sup>1</sup>, Sajad Moshkelgosha<sup>1</sup>, Rasheed Ghany<sup>1</sup>, Eyal Fuchs <sup>1</sup>, Chung-Wai Chow <sup>1</sup>, Shaf Keshavjee<sup>1</sup>, Lianne G. Singer<sup>1</sup>, Jussi Tikkanen<sup>1,4</sup> and Tereza Martinu<sup>1,4</sup>

<sup>1</sup>Toronto Lung Transplant Program, University Health Network, University of Toronto, Toronto, ON, Canada. <sup>2</sup>Institute of Pulmonary Medicine, Sheba Medical Center, Sackler Faculty of Medicine, Tel-Aviv University, Tel Aviv, Israel. <sup>3</sup>Biostatistics Research Unit, University Health Network, University of Toronto, Toronto, ON, Canada. <sup>4</sup>These authors have contributed equally to this work.

Liran Levy (liran.levy@sheba.gov.il)

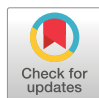

Shareable abstract (@ERSpublications)

In lung transplant recipients with suspected restrictive allograft syndrome/mixed phenotype and a preserved forced vital capacity, accurate phenotyping requires routine measurements of total lung capacity <https://bit.ly/3e2qxdP>

**Cite this article as:** Levy L, Huszti E, Berra G, *et al.* The accuracy of forced vital capacity for diagnosing restrictive allograft syndrome and mixed phenotype of chronic lung allograft dysfunction. *Eur Respir J* 2021; 58: 2003387 [DOI: 10.1183/13993003.03387-2020].

This single-page version can be shared freely online.

Copyright ©The authors 2021. For reproduction rights and permissions contact [permissions@ersnet.org](mailto:permissions@ersnet.org)

Received: 11 Sept 2020  
Accepted: 28 Feb 2021

## To the Editor:

Lung transplantation has become an invaluable approach for the treatment of end-stage respiratory diseases. However, survival after lung transplant remains limited due to chronic lung allograft dysfunction (CLAD), a fibrotic process affecting the airway and/or parenchymal compartments of the lung graft leading to a significant and persistent deterioration in lung function [1, 2]. With our accelerating understanding of CLAD, it has become evident that CLAD is a heterogeneous process comprised of multiple patterns of physiological and radiological features, which have strong implications for post-CLAD survival [3]. In a consensus document published by the International Society for Heart and Lung Transplantation (ISHLT) [2], CLAD remains defined as substantial and persistent decline ( $\geq 20\%$ ) in forced expiratory volume in 1 s ( $FEV_1$ ) from baseline, not explained by other conditions. There are four CLAD phenotypes defined by the presence or absence of obstruction ( $FEV_1$ /forced vital capacity (FVC)  $\leq 70\%$ ), restriction (total lung capacity (TLC)  $\leq 90\%$  of baseline), and persistent pulmonary opacities on imaging (persistent parenchymal opacities and/or increasing pleural thickening consistent with a diagnosis of pulmonary and/or pleural fibrosis and likely to cause a restrictive physiology [2]). Bronchiolitis obliterans syndrome (BOS) is characterised by an obstructive ventilatory defect and no persistent pulmonary opacities; restrictive allograft syndrome (RAS) is characterised by a restrictive ventilatory defect with persistent pulmonary opacities; Mixed phenotype is characterised by a combination of obstructive and restrictive ventilatory defect, along with persistent opacities on chest imaging. Two “undefined” phenotypes, as outlined in the ISHLT consensus document, include 1) obstruction with persistent pulmonary opacities and no restriction; 2) a combined obstruction and restriction without persistent pulmonary opacities. Our group has previously shown that a subset of patients do not fit any of these combinations and remain unclassified [1] (patients

Copyright ©The authors 2021. For reproduction rights and permissions contact [permissions@ersnet.org](mailto:permissions@ersnet.org)

with a persistent decline in  $FEV_1$  who do not meet criteria for obstruction or restriction or patients with a restrictive ventilatory defect without the presence of persistent pulmonary opacities).
